# Supplementary material
Source: MDPI journal article supplement (https://www.mdpi.com/2076-0760/11/1/27)
Supplement: s1 [file s1]

**Supplemental Table S1.** Estimated Log Odds Coefficients (and Standard Errors) of Widowhood/Death from Multinomial Logistic Regression.

|                            | Gender-Specific Acquired Disability. |                    |                    | Couple-Level Acquired Disability |                 |
|----------------------------|--------------------------------------|--------------------|--------------------|----------------------------------|-----------------|
|                            | Model 1                              | Model 2            | Model 3            | Model 4                          | Model 5         |
| Marital Quality            |                                      |                    |                    |                                  |                 |
| Low enjoyment              | -0.02 (0.07)                         | 0.02 (0.08)        | -0.00 (0.08)       | -0.03 (0.07)                     | 0.06 (0.09)     |
| Acquired Disability        |                                      |                    |                    |                                  |                 |
| Husband disability         | 0.58 ***<br>(0.07)                   | 0.58 ***<br>(0.07) | 0.60 ***<br>(0.08) |                                  |                 |
| Wife disability            | 0.47 ***<br>(0.09)                   | 0.53 ***<br>(0.10) | 0.47 ***<br>(0.09) |                                  |                 |
| Couple-level disability    |                                      |                    |                    | 0.62 *** (0.07)                  | 0.63 *** (0.07) |
| Interaction Terms          |                                      |                    |                    |                                  |                 |
| Low Enjoyment*Husband ADL  |                                      |                    | -0.09 (0.16)       |                                  |                 |
| Low Enjoyment*Wife ADL     |                                      | -0.26 (0.19)       |                    |                                  |                 |
| Low Enjoyment*Couple ADL   |                                      |                    |                    |                                  | -0.30 * (0.15)  |
| Intercept                  | -5.61                                | -5.61              | -5.61              | -5.62                            | -5.97           |
| Rao-Scott Likelihood Ratio | 40.24 ***                            | 38.57 ***          | 38.52 ***          | 42.38 ***                        | 40.64 ***       |
| Degrees of Freedom         | 61.51                                | 64.39              | 64.39              | 58.76                            | 61.68           |

Notes: \*  $p < 0.05$ ; \*\*\*  $p < 0.001$ ; Weighted using Wave 1 household-level weights.

**Supplemental Table S2.** Estimated Log Odds Coefficients (and Standard Errors) of Divorce/Separation from Multinomial Logistic Regression among Couples with Any Disability Status at Wave 1 (N = 33,624 marriage-periods).

|                            | Gender-Specific Disability Status |                  |                  | Couple-Level Disability Status |                  |
|----------------------------|-----------------------------------|------------------|------------------|--------------------------------|------------------|
|                            | Model 1                           | Model 2          | Model 3          | Model 4                        | Model 5          |
| Marital Quality            |                                   |                  |                  |                                |                  |
| Low enjoyment              | 1.31 *** (0.15)                   | 1.45 *** (0.15)  | 1.44 *** (0.16)  | 1.31 *** (0.15)                | 1.58 *** (0.17)  |
| Disability Status          |                                   |                  |                  |                                |                  |
| Husband has disability     | 0.23 (0.23)                       | 0.23 (0.23)      | 0.69 * (0.27)    |                                |                  |
| Wife has disability        | 0.50 * (0.21)                     | 0.90 *** (0.26)  | 0.49 * (0.22)    |                                |                  |
| Couple-level disability    |                                   |                  |                  | 0.35 † (0.19)                  | 0.88 *** (0.23)  |
| Interaction Terms          |                                   |                  |                  |                                |                  |
| Low enjoyment*Husband ADL  |                                   |                  | -1.08 * (0.44)   |                                |                  |
| Low enjoyment*Wife ADL     |                                   | -0.91 * (0.40)   |                  |                                |                  |
| Low enjoyment*Couple ADL   |                                   |                  |                  |                                | -1.20 *** (0.34) |
| Period                     | -0.19 *** (0.03)                  | -0.19 *** (0.03) | -0.19 *** (0.03) | -0.19 *** (0.03)               | -0.19 *** (0.03) |
| Intercept                  | 0.57                              | 0.48             | 0.52             | 0.67                           | 0.53             |
| Rao-Scott Likelihood Ratio | 46.39 ***                         | 44.46 ***        | 44.53 ***        | 49.08 ***                      | 47.14 ***        |
| Degrees of Freedom         | 61.69                             | 64.63            | 64.68            | 58.93                          | 61.92            |

Notes: †  $p < 0.10$ ; \*  $p < 0.05$ ; \*\*\*  $p < 0.001$ ; Weighted using Wave 1 household-level weights.

**Supplemental Table S3.** Estimated Log Odds Coefficients (and Standard Errors) of Divorce/Separation from Multinomial Logistic Regression among Couples with Any Disability Status at Wave 1 (N = 33,624 marriage-periods).

|                                             | Disability Only  | Chronic Conditions Only | Disability + Chronic Conditions |
|---------------------------------------------|------------------|-------------------------|---------------------------------|
| Marital Quality                             |                  |                         |                                 |
| Low enjoyment                               | 1.31 *** (0.15)  | 1.31 *** (0.15)         | 1.31 *** (0.15)                 |
| Disability Status                           |                  |                         |                                 |
| Husband has disability                      | 0.23 (0.23)      |                         | 0.24 (0.23)                     |
| Wife has disability                         | 0.50 * (0.21)    |                         | 0.44 * (0.22)                   |
| Couple-level disability                     |                  |                         |                                 |
| Number of Chronic Conditions Ever Diagnosed |                  |                         |                                 |
| Husband's Chronic Conditions                |                  | 0.05 (0.07)             | 0.04 (0.07)                     |
| Wife's Chronic Conditions                   |                  | 0.14 * (0.07)           | 0.12 † (0.07)                   |
| Period                                      | -0.19 *** (0.03) | -0.22 *** (0.03)        | -0.22 *** (0.03)                |
| Intercept                                   | 0.57             | 0.60                    | 0.30                            |
| Rao-Scott Likelihood Ratio                  | 46.39 ***        | 46.70 ***               | 43.42 ***                       |
| Degrees of Freedom                          | 61.69            | 61.84                   | 67.49                           |

Notes: †  $p < 0.10$ ; \*  $p < 0.05$ ; \*\*\*  $p < 0.001$ ; Weighted using Wave 1 household-level weights.
